# Supplementary material
Source: PubMed Central journal article supplement (PMC2872761)
Supplement: NIHMS29671-supplement-SupplTable1.pdf [file NIHMS29671-supplement-SupplTable1.pdf]

**Supplementary Table 1: Top pairwise interactions as detected from a `--fast-epistasis` analysis of the WTCCC Crohn's disease and control data using PLINK**

| SNP1       |     |           |                | SNP2       |     |           |                | Interaction test |                |
|------------|-----|-----------|----------------|------------|-----|-----------|----------------|------------------|----------------|
|            |     |           | Single-locus   |            |     |           | Single-locus   |                  |                |
| SNP        | Chr | Position  | <i>p</i> value | SNP        | Chr | Position  | <i>p</i> value | $\chi^2$         | <i>p</i> value |
| rs9436212  | 1   | 61643372  | 0.08463        | rs11649428 | 16  | 76266378  | 0.1423         | 37.94            | 7.315e-10      |
| rs12751992 | 1   | 63186351  | 0.1514         | rs1601668  | 12  | 18826761  | 0.08044        | 35.10            | 3.144e-09      |
| rs4677143  | 3   | 72439370  | 0.04577        | rs8006622  | 14  | 39419113  | 0.05631        | 35.32            | 2.809e-09      |
| rs1584444  | 4   | 59536174  | 0.02352        | rs2201677  | 4   | 102215684 | 0.07998        | 38.25            | 6.233e-10      |
| rs1584444  | 4   | 59536174  | 0.02352        | rs12647454 | 4   | 102219636 | 0.0633         | 37.73            | 8.157e-10      |
| rs1584444  | 4   | 59536174  | 0.02352        | rs6532916  | 4   | 102227529 | 0.02714        | 38.18            | 6.493e-10      |
| rs1584444  | 4   | 59536174  | 0.02352        | rs10027689 | 4   | 102233096 | 0.03322        | 35.26            | 2.899e-09      |
| rs668394   | 6   | 154460193 | 0.1078         | rs10156534 | 9   | 2926864   | 0.1464         | 38.13            | 6.637e-10      |
| rs511435   | 6   | 154460661 | 0.1116         | rs10156534 | 9   | 2926864   | 0.1464         | 36.56            | 1.486e-09      |
| rs509544   | 6   | 154460900 | 0.1049         | rs10156534 | 9   | 2926864   | 0.1464         | 37.66            | 8.461e-10      |
| rs524731   | 6   | 154467206 | 0.1094         | rs10156534 | 9   | 2926864   | 0.1464         | 37.19            | 1.078e-09      |
| rs7773053  | 6   | 156486474 | 0.1308         | rs17825620 | 14  | 77254414  | 0.1664         | 36.94            | 1.225e-09      |
| rs2358356  | 10  | 19538800  | 0.08709        | rs9540533  | 13  | 65213814  | 0.06114        | 35.53            | 2.517e-09      |
| rs2478836  | 10  | 30454756  | 0.09764        | rs7217284  | 17  | 56691176  | 0.187          | 37.43            | 9.515e-10      |
| rs636646   | 13  | 76492331  | 0.04548        | rs301630   | 16  | 85211439  | 0.009047       | 37.56            | 8.895e-10      |
| rs7202714  | 16  | 30085308  | 0.0322         | rs4471699  | 16  | 30227808  | 1.593e-22      | 51.56            | 6.979e-13      |
